# Supplementary material
Source: PubMed Central journal article supplement (PMC9188765)
Supplement: NIHMS1800465-supplement-Supp_Info.pdf [file NIHMS1800465-supplement-Supp_Info.pdf]

## Supplemental Information

**SUPPLEMENTAL TABLE 3** Summary of SEED 2 Verbatim Responses on Nonfood Items Child Ingested

| Item                                                                                                                                                           | <i>n</i> (Not Mutually Exclusive) |
|----------------------------------------------------------------------------------------------------------------------------------------------------------------|-----------------------------------|
| Paper, tissue, and related products                                                                                                                            | 67                                |
| Dirt, sand, etc                                                                                                                                                | 36                                |
| Small toys                                                                                                                                                     | 37                                |
| Hygiene and beauty products, including lotions, toothpaste, deodorant, foot powder, soap, bubbles, lipstick, and nail polish                                   | 27                                |
| Crayons, chalk, and Play-Doh                                                                                                                                   | 26                                |
| Rocks and shells                                                                                                                                               | 21                                |
| Tree bark, acorns, flowers, leaves, grass, and wood chips                                                                                                      | 20                                |
| Dirty water, including puddles, bathwater, pools, etc                                                                                                          | 20                                |
| Straws and small plastic items                                                                                                                                 | 16                                |
| String (including strings from clothes and blankets) and buttons                                                                                               | 15                                |
| Coins, nails, bottle caps, and metal                                                                                                                           | 12                                |
| Rubber bands and balloons                                                                                                                                      | 8                                 |
| Paint and drywall                                                                                                                                              | 7                                 |
| Housecleaning products, including dryer sheets and dishwasher soap                                                                                             | 6                                 |
| Foam, furniture stuffing, and sponges                                                                                                                          | 6                                 |
| Hair                                                                                                                                                           | 6                                 |
| Glue                                                                                                                                                           | 5                                 |
| Pencils, pens, and erasers                                                                                                                                     | 5                                 |
| Feces                                                                                                                                                          | 4                                 |
| Ashes and coal                                                                                                                                                 | 3                                 |
| Batteries                                                                                                                                                      | 3                                 |
| Pet food                                                                                                                                                       | 2                                 |
| Candles and wax                                                                                                                                                | 2                                 |
| Medicine                                                                                                                                                       | 2                                 |
| Wire                                                                                                                                                           | 2                                 |
| Diaper                                                                                                                                                         | 1                                 |
| Chlorine tablet                                                                                                                                                | 1                                 |
| Trash                                                                                                                                                          | 1                                 |
| Other general responses, such as anything, everything, stuff on floor, puts everything in mouth, chews nonfood items, puts objects in mouth, liquid in bottles | 33                                |

**SUPPLEMENTAL TABLE 4** Stratified Analyses of the Associations Between Study Case Classification and Pica: ASD Groups and Subgroups Compared With POP Group

|                             | ASD (All) <sup>a</sup> Versus POP |                                  | ASD + ID Versus POP          |                                  | ASD Without ID Versus POP    |                                  |
|-----------------------------|-----------------------------------|----------------------------------|------------------------------|----------------------------------|------------------------------|----------------------------------|
|                             | Stratum-Specific PR (95% CI)      | Weighted MH-Adjusted PR (95% CI) | Stratum-Specific PR (95% CI) | Weighted MH-Adjusted PR (95% CI) | Stratum-Specific PR (95% CI) | Weighted MH-Adjusted PR (95% CI) |
| Child sex                   |                                   |                                  |                              |                                  |                              |                                  |
| Male                        | 6.3 (4.3–9.2)                     | 6.9 (5.2–9.2)                    | 7.7 (5.3–11.2)               | 8.2 (6.1–11.1)                   | 3.6 (2.3–5.6)                | 4.1 (2.9–5.9)                    |
| Female                      | 8.3 (5.5–12.7)                    |                                  | 9.7 (6.3–15.0)               |                                  | 6.0 (3.5–10.3)               |                                  |
| Child age, mo               |                                   |                                  |                              |                                  |                              |                                  |
| 30–48                       | 8.7 (5.1–15.1)                    | 6.7 (5.1–8.8)                    | 9.8 (5.6–17.1)               | 8.0 (6.1–10.6)                   | 6.5 (3.5–12.1)               | 4.0 (2.9–5.6)                    |
| 48–68                       | 6.1 (4.4–8.4)                     |                                  | 7.6 (5.5–10.4)               |                                  | 3.3 (2.2–5.0)                |                                  |
| Maternal age, y             |                                   |                                  |                              |                                  |                              |                                  |
| <30                         | 3.7 (2.1–6.5)                     |                                  | 4.1 (2.3–7.4)                |                                  | 2.2 (1.0–5.0)                |                                  |
| 30–34                       | 9.8 (5.2–18.5)                    | 6.6 (5.0–8.7)                    | 11.8 (6.2–22.5)              | 7.9 (6.0–10.4)                   | 5.3 (2.5–11.2)               | 4.0 (2.9–5.6)                    |
| ≥35                         | 6.9 (4.8–9.9)                     |                                  | 8.5 (5.8–12.2)               |                                  | 4.3 (2.8–6.7)                |                                  |
| Maternal race or ethnicity  |                                   |                                  |                              |                                  |                              |                                  |
| NHW                         | 7.5 (5.1–10.9)                    |                                  | 9.5 (6.4–13.9)               |                                  | 4.8 (3.1–7.5)                |                                  |
| NHB                         | 5.0 (2.8–9.2)                     |                                  | 5.4 (3.0–10.0)               |                                  | 3.3 (1.5–7.2)                |                                  |
| Hispanic                    | 6.2 (2.7–14.0)                    | 6.2 (4.7–8.2)                    | 7.4 (3.3–16.8)               | 7.3 (5.5–9.7)                    | 3.2 (1.2–8.9)                | 3.9 (2.8–5.5)                    |
| Other or multiracial        | 4.1 (1.9–8.9)                     |                                  | 5.0 (2.3–11.1)               |                                  | 2.3 (0.9–6.2)                |                                  |
| Maternal education          |                                   |                                  |                              |                                  |                              |                                  |
| <Bachelor's degree          | 4.2 (2.9–6.1)                     | 5.9 (4.5–7.8)                    | 4.9 (3.4–7.1)                | 6.9 (5.3–9.1)                    | 2.7 (1.7–4.2)                | 3.7 (2.7–5.2)                    |
| Bachelor's degree or higher | 8.8 (5.9–13.4)                    |                                  | 11.1 (7.3–16.9)              |                                  | 5.4 (3.3–8.7)                |                                  |
| Family income, \$           |                                   |                                  |                              |                                  |                              |                                  |
| <50 000                     | 5.0 (3.3–7.7)                     |                                  | 5.4 (3.5–8.3)                |                                  | 3.7 (2.2–6.2)                |                                  |
| 50–89 999                   | 7.9 (4.0–15.6)                    | 6.3 (4.8–8.4)                    | 11.1 (5.6–21.9)              | 7.4 (5.7–9.9)                    | 3.7 (1.6–8.2)                | 4.2 (3.0–5.8)                    |
| 90 000+                     | 7.5 (4.7–11.8)                    |                                  | 9.5 (5.9–15.2)               |                                  | 5.0 (2.9–8.6)                |                                  |

CI, confidence interval; MH, Mantel-Haenszel; NHB, non-Hispanic Black;

<sup>a</sup> This includes children missing data on IQ, as noted in Fig 1.

**SUPPLEMENTAL TABLE 5** Stratified Analyses of the Associations Between Study Case Classification and Pica: DD Groups and Subgroups Compared

|                             | With POP Group               |                      |                                  |                      | DD (All) <sup>a</sup> Versus POP |                      |                                  |                      | DD With ASD Characteristics, No ID Versus POP |                      |                                  |                      | DD With ID, No ASD Characteristics Versus POP |                      |                                  |                      | DD With No ASD Characteristics Versus POP |                      |                                  |                      |
|-----------------------------|------------------------------|----------------------|----------------------------------|----------------------|----------------------------------|----------------------|----------------------------------|----------------------|-----------------------------------------------|----------------------|----------------------------------|----------------------|-----------------------------------------------|----------------------|----------------------------------|----------------------|-------------------------------------------|----------------------|----------------------------------|----------------------|
|                             | Stratum-Specific PR (95% CI) |                      | Weighted MH-Adjusted PR (95% CI) |                      | Stratum-Specific PRs (95% CI)    |                      | Weighted MH-Adjusted PR (95% CI) |                      | Stratum-Specific PRs (95% CI)                 |                      | Weighted MH-Adjusted PR (95% CI) |                      | Stratum-Specific PR (95% CI)                  |                      | Weighted MH-Adjusted PR (95% CI) |                      | Stratum-Specific PR (95% CI)              |                      | Weighted MH-Adjusted PR (95% CI) |                      |
|                             | PR (95% CI)                  | Weighted PR (95% CI) | PR (95% CI)                      | Weighted PR (95% CI) | PR (95% CI)                      | Weighted PR (95% CI) | PR (95% CI)                      | Weighted PR (95% CI) | PR (95% CI)                                   | Weighted PR (95% CI) | PR (95% CI)                      | Weighted PR (95% CI) | PR (95% CI)                                   | Weighted PR (95% CI) | PR (95% CI)                      | Weighted PR (95% CI) | PR (95% CI)                               | Weighted PR (95% CI) | PR (95% CI)                      | Weighted PR (95% CI) |
| Child sex                   |                              |                      |                                  |                      |                                  |                      |                                  |                      |                                               |                      |                                  |                      |                                               |                      |                                  |                      |                                           |                      |                                  |                      |
| Male                        | 2.4 (1.6–3.6)                | 2.4 (1.8–3.3)        | 7.3 (4.6–11.7)                   | 7.6 (5.2–11.0)       | 3.1 (1.9–5.1)                    | 3.5 (2.4–5.1)        | 2.3 (1.2–4.4)                    | 2.8 (1.7–4.5)        | 1.1 (0.6–1.9)                                 | 0.9 (0.6–1.4)        |                                  |                      |                                               |                      |                                  |                      |                                           |                      |                                  |                      |
| Female                      | 2.5 (1.5–3.9)                |                      | 8.1 (4.5–14.6)                   |                      | 4.2 (2.4–7.4)                    |                      | 3.6 (1.9–7.1)                    |                      | 0.6 (0.3–1.4)                                 |                      |                                  |                      |                                               |                      |                                  |                      |                                           |                      |                                  |                      |
| Child age, mo               |                              |                      |                                  |                      |                                  |                      |                                  |                      |                                               |                      |                                  |                      |                                               |                      |                                  |                      |                                           |                      |                                  |                      |
| 30–48                       | 3.4 (1.9–6.1)                | 2.4 (1.8–3.3)        | 9.6 (4.7–19.6)                   | 7.5 (5.2–10.7)       | 6.0 (3.1–11.6)                   | 3.4 (2.4–5.0)        | 3.2 (1.3–8.0)                    | 2.8 (1.7–4.5)        | 1.1 (0.4–2.6)                                 | 0.9 (0.6–1.4)        |                                  |                      |                                               |                      |                                  |                      |                                           |                      |                                  |                      |
| 48–68                       | 2.1 (1.5–3.0)                |                      | 7.0 (4.6–10.6)                   |                      | 2.7 (1.7–4.2)                    |                      | 2.6 (1.5–4.6)                    |                      | 0.9 (0.5–1.5)                                 |                      |                                  |                      |                                               |                      |                                  |                      |                                           |                      |                                  |                      |
| Maternal age, y             |                              |                      |                                  |                      |                                  |                      |                                  |                      |                                               |                      |                                  |                      |                                               |                      |                                  |                      |                                           |                      |                                  |                      |
| <30                         | 1.9 (1.1–3.5)                |                      | 4.7 (2.3–9.3)                    |                      | 2.1 (1.0–4.2)                    |                      | 2.1 (0.8–5.5)                    |                      | 0.8 (0.3–2.0)                                 |                      |                                  |                      |                                               |                      |                                  |                      |                                           |                      |                                  |                      |
| 30–34                       | 3.4 (1.7–6.7)                | 2.3 (1.7–3.1)        | 8.0 (3.6–18.0)                   | 6.9 (4.8–9.9)        | 4.9 (2.2–11.0)                   | 3.1 (2.1–4.5)        | 3.1 (1.0–9.5)                    | 2.7 (1.7–4.3)        | 1.5 (0.6–3.8)                                 | 0.9 (0.6–1.4)        |                                  |                      |                                               |                      |                                  |                      |                                           |                      |                                  |                      |
| ≥35                         | 2.1 (1.4–3.2)                |                      | 8.6 (5.2–14.0)                   |                      | 3.3 (1.9–5.6)                    |                      | 2.9 (1.5–5.3)                    |                      | 0.8 (0.4–1.5)                                 |                      |                                  |                      |                                               |                      |                                  |                      |                                           |                      |                                  |                      |
| Maternal race or ethnicity  |                              |                      |                                  |                      |                                  |                      |                                  |                      |                                               |                      |                                  |                      |                                               |                      |                                  |                      |                                           |                      |                                  |                      |
| NHW                         | 2.0 (1.3–3.1)                |                      | 8.3 (4.6–15.0)                   |                      | 3.7 (2.1–6.3)                    |                      | 3.0 (1.5–6.0)                    |                      | 0.7 (0.4–1.4)                                 |                      |                                  |                      |                                               |                      |                                  |                      |                                           |                      |                                  |                      |
| NHB                         | 2.3 (1.2–4.4)                | 2.1 (1.5–2.9)        | 5.5 (2.7–11.1)                   | 6.3 (4.2–9.3)        | 2.5 (1.2–5.2)                    | 3.0 (2.1–4.5)        | 2.8 (1.2–6.9)                    | 2.6 (1.6–4.1)        | 0.8 (0.3–2.1)                                 | 0.8 (0.5–1.3)        |                                  |                      |                                               |                      |                                  |                      |                                           |                      |                                  |                      |
| Hispanic                    | 3.0 (1.3–6.9)                |                      | 6.0 (2.4–14.9)                   |                      | 4.8 (1.9–12.5)                   |                      | 2.1 (0.6–7.1)                    |                      | 1.5 (0.5–4.1)                                 |                      |                                  |                      |                                               |                      |                                  |                      |                                           |                      |                                  |                      |
| Other or multiracial        | 1.2 (0.5–3.1)                |                      | 5.1 (1.7–15.6)                   |                      | 0.6 (0.07–4.6)                   |                      | 1.0 (0.1–7.8)                    |                      | 0.8 (0.2–2.8)                                 |                      |                                  |                      |                                               |                      |                                  |                      |                                           |                      |                                  |                      |
| Maternal education          |                              |                      |                                  |                      |                                  |                      |                                  |                      |                                               |                      |                                  |                      |                                               |                      |                                  |                      |                                           |                      |                                  |                      |
| <Bachelor's degree          | 2.0 (1.3–2.9)                | 2.0 (1.5–2.7)        | 4.6 (3.0–7.2)                    | 5.0 (3.4–7.4)        | 2.2 (1.4–3.6)                    | 2.6 (1.8–3.8)        | 1.8 (1.0–3.4)                    | 2.3 (1.5–3.8)        | 0.8 (0.4–1.4)                                 | 0.9 (0.5–1.3)        |                                  |                      |                                               |                      |                                  |                      |                                           |                      |                                  |                      |
| Bachelor's degree or higher | 2.1 (1.3–3.4)                |                      | 7.6 (3.6–16.0)                   |                      | 3.8 (2.0–7.2)                    |                      | 3.4 (1.6–7.2)                    |                      | 0.9 (0.5–1.8)                                 |                      |                                  |                      |                                               |                      |                                  |                      |                                           |                      |                                  |                      |
| Family income, \$           |                              |                      |                                  |                      |                                  |                      |                                  |                      |                                               |                      |                                  |                      |                                               |                      |                                  |                      |                                           |                      |                                  |                      |
| <50 000                     | 2.0 (1.3–3.2)                |                      | 4.2 (2.5–7.0)                    |                      | 2.3 (1.4–4.0)                    |                      | 1.8 (0.9–3.7)                    |                      | 0.9 (0.5–1.8)                                 |                      |                                  |                      |                                               |                      |                                  |                      |                                           |                      |                                  |                      |
| 50–89 999                   | 2.8 (1.3–5.8)                | 2.0 (1.5–2.8)        | 15.6 (7.1–34.6)                  | 5.5 (3.7–8.2)        | 4.1 (1.6–10.2)                   | 2.6 (1.7–3.9)        | 4.0 (1.4–11.6)                   | 2.4 (1.4–3.9)        | 0.6 (0.2–2.1)                                 | 0.9 (0.6–1.4)        |                                  |                      |                                               |                      |                                  |                      |                                           |                      |                                  |                      |
| 90 000+                     | 1.6 (0.9–2.9)                |                      | 5.6 (1.8–17.3)                   |                      | 2.6 (1.1–6.2)                    |                      | 2.7 (1.1–7.0)                    |                      | 1.0 (0.5–2.1)                                 |                      |                                  |                      |                                               |                      |                                  |                      |                                           |                      |                                  |                      |

CI, confidence interval; MH, xxx; NHB, non-Hispanic Black.

<sup>a</sup> This includes children missing data on IQ, as noted in Fig 1.

**SUPPLEMENTAL TABLE 6** Prevalence of Pica and Associations Between Study Case Classification and Pica by Using a More Restrictive Pica Definition (Pica = Very True or Often True)

| Study Case Classification                    | Total, <i>n</i> | Pica = Yes, <i>n</i> (%) | PR <sup>a</sup> (95% CI) | aPR <sup>b</sup> (95% CI) |
|----------------------------------------------|-----------------|--------------------------|--------------------------|---------------------------|
| POP                                          | 1578            | 11 (0.7)                 | Reference                | Reference                 |
| ASD (all) <sup>c</sup>                       | 1426            | 138 (9.7)                | 13.9 (7.5–25.5)          | 12.1 (6.5–22.7)           |
| ASD + ID                                     | 880             | 110 (12.5)               | 17.9 (9.7–33.1)          | 16.1 (8.5–30.6)           |
| ASD without ID                               | 529             | 25 (4.7)                 | 6.8 (3.4–13.7)           | 5.9 (2.9–12.1)            |
| DD (all) <sup>c</sup>                        | 1735            | 49 (2.8)                 | 4.1 (2.1–7.8)            | 3.1 (1.6–6.0)             |
| DD with both ID and some ASD characteristics | 175             | 15 (8.6)                 | 12.3 (5.7–26.4)          | 8.0 (3.0–21.4)            |
| DD with ASD characteristics but without ID   | 392             | 20 (5.1)                 | 7.3 (3.5–15.1)           | 5.8 (2.6–12.7)            |
| DD with ID but without ASD characteristics   | 227             | 7 (3.1)                  | 4.4 (1.7–11.3)           | 3.5 (1.2–10.4)            |
| DD with neither ID nor ASD characteristics   | 932             | 7 (0.8)                  | 1.1 (0.4–2.8)            | 0.9 (0.4–2.3)             |

CI, confidence interval.

<sup>a</sup> PRs derived in which the prevalence of pica (very true or often true) for each ASD and DD group and subgroup was compared with the prevalence for the POP group.

<sup>b</sup> aPRs derived from modified Poisson regression models in which ASD and DD groups and subgroups (8 models) were compared with the POP group. All models included adjustment for child sex, child age, maternal age, maternal race or ethnicity, maternal education, and household income.

<sup>c</sup> This includes children missing data on IQ, as noted in Fig 1.
